# Supplementary material for: Native detection of protein O-GlcNAcylation by gel electrophoresis
Source: Royal Society of Chemistry journal article supplement (doi:10.1039/c9an02506e), 2020-01-01
Supplement: c9an02506e1.xlsx [file c9an02506e1.xlsx]

## Sheet: malemide+AcrylSites
Positions within proteins	Localization prob	Score diff	PEP	Score	Delta score	Score for localization	Localization prob AI-OGA	Score diff AI-OGA	PEP AI-OGA	Score AI-OGA	Localization prob OGA_mut	Score diff OGA_mut	PEP OGA_mut	Score OGA_mut	Number of malemide+Acryl	Amino acid	malemide+Acryl Probabilities	malemide+Acryl Score diffs	Position in peptide	Charge	Mass error [ppm]	Identification type AI-OGA	Identification type OGA_mut	Intensity	Intensity AI-OGA	Intensity OGA_mut	Ratio mod/base AI-OGA	Ratio mod/base OGA_mut	Intensity AI-OGA___1	id	Protein group IDs	Positions	Position	Peptide IDs	Mod. peptide IDs	Evidence IDs	MS/MS IDs	Best localization evidence ID	Best localization MS/MS ID	Best localization raw file	Best localization scan number	Best score evidence ID	Best score MS/MS ID	Best score raw file	Best score scan number	Best PEP evidence ID	Best PEP MS/MS ID	Best PEP raw file	Best PEP scan number
705	1	63.5651	3.17526e-05	63.565	57.261	63.565	1	63.5651	3.17526e-05	63.565	0	0	0	0	1	K	AK(1)MDELWNK	AK(63.57)MDELWNK(-63.57)	2	2	-0.41055	By MS/MS		1232400	1232400	0	0.081728	0	1232400	2	11	705	705	6	15	196	247	196	247	CF_AI-OGA	18361	196	247	CF_AI-OGA	18361	196	247	CF_AI-OGA	18361
712	0.995143	23.1152	1.64464e-08	85.377	77.779	85.377	0.995143	23.1152	1.64464e-08	85.377	0	0	0	0	1	K	MDELWNK(0.995)LSSK(0.005)	MDELWNK(23.12)LSSK(-23.12)	7	2	0.16255	By MS/MS		1145400	1145400	0	0.072005	0	1145400	3	11	712	712	6;83	15;125	1306	1455	1306	1455	CF_AI-OGA	20931	1306	1455	CF_AI-OGA	20931	1306	1455	CF_AI-OGA	20931
40	1	47.9065	0.00279132	47.907	41.542	47.907	1	47.9065	0.00279132	47.907	0	0	0	0	1	K	DEGDK(1)WR	DEGDK(47.91)WR	5	2	-0.062404	By MS/MS		0	0	0	0	0	0	4	11	40	40	14	26	245	294	245	294	CF_AI-OGA	17106	245	294	CF_AI-OGA	17106	245	294	CF_AI-OGA	17106
521	0.5	0	0.0042863	41.979	41.979	41.979	0.5	0	0.0042863	41.979	0	0	0	0	1	K	FNEEFVK(0.5)AK(0.5)	FNEEFVK(0)AK(0)	7	2	-0.037052	By MS/MS		2965000	2965000	0	NaN	NaN	2965000	5	11	521	521	34	51	504	577	504	577	CF_AI-OGA	15730	504	577	CF_AI-OGA	15730	504	577	CF_AI-OGA	15730
523	0.5	0	0.0042863	41.979	41.979	41.979	0.5	0	0.0042863	41.979	0	0	0	0	1	K	FNEEFVK(0.5)AK(0.5)	FNEEFVK(0)AK(0)	9	2	-0.037052	By MS/MS		2965000	2965000	0	NaN	NaN	2965000	6	11	523	523	34	51	504	577	504	577	CF_AI-OGA	15730	504	577	CF_AI-OGA	15730	504	577	CF_AI-OGA	15730
87	1	50.909	0.000315261	54.471	48.93	50.909	1	50.909	0.000315261	54.471	0	0	0	0	1	K	HNMLGGCPK(1)ER	HNMLGGCPK(50.91)ER	9	2	0.78323	By MS/MS		8084300	7445600	0	0.072501	NaN	7445600	7	11	87	87	47	73	688;689	772;773	689	773	CF_AI-OGA	10191	688	772	CF_AI-OGA	10158	688	772	CF_AI-OGA	10158
113	1	73.2693	7.70058e-34	144.77	139.99	144.77	1	73.2693	7.70058e-34	144.77	0	0	0	0	1	K	IAYSK(1)DFETLK	IAYSK(73.27)DFETLK(-73.27)	5	2	-0.23792	By MS/MS		66102000	1810500	0	0.15785	0	1810500	8	11	113	113	49	75	693;694	778;779	694	779	CF_AI-OGA	18118	694	779	CF_AI-OGA	18118	694	779	CF_AI-OGA	18118
11	1	169.123	9.49169e-50	169.12	169.12	169.12	1	169.123	9.49169e-50	169.12	0	0	0	0	1	K	IK(1)GLVQPTR	IK(169.12)GLVQPTR	2	2	0.016609	By MS/MS	By matching	174860000	572950	118900	NaN	NaN	572950	9	11	11	11	56;115	86;174	783;784;785;786;1703;1704	858;859;860;861;862;1910	786	861	CF_AI-OGA	15304	786	861	CF_AI-OGA	15304	786	861	CF_AI-OGA	15304
45	1	66.8738	6.02614e-11	66.874	59.513	66.874	1	66.8738	6.02614e-11	66.874	0	0	0	0	1	K	K(1)FELGLEFPNLPYYIDGDVK	K(66.87)FELGLEFPNLPYYIDGDVK(-66.87)	1	3	-0.23528	By MS/MS		4816700	4816700	0	3.6138	0	4816700	10	11	45	45	61	93	809	884	809	884	CF_AI-OGA	22119	809	884	CF_AI-OGA	22119	809	884	CF_AI-OGA	22119
404	0.999327	31.7138	0.000881642	47.938	43.921	47.938	0.999327	31.7138	0.000881642	47.938	0	0	0	0	1	K	LDQIK(0.999)FYGENK(0.001)	LDQIK(31.71)FYGENK(-31.71)	5	2	0.19075	By MS/MS		3470500	3470500	0	NaN	NaN	3470500	11	11	404	404	66	99	920	1007	920	1007	CF_AI-OGA	17428	920	1007	CF_AI-OGA	17428	920	1007	CF_AI-OGA	17428
419	1	97.4499	3.11189e-15	97.45	95.483	97.45	1	97.4499	3.11189e-15	97.45	0	0	0	0	1	K	LNTYIYAPK(1)DDPYHR	LNTYIYAPK(97.45)DDPYHR	9	3	0.73784	By MS/MS		18730000	18730000	0	10.551	0	18730000	12	11	419	419	76	112	1094	1201	1094	1201	CF_AI-OGA	16240	1094	1201	CF_AI-OGA	16240	1094	1201	CF_AI-OGA	16240
131	1	135.859	1.6223e-26	135.86	128.65	135.86	1	135.859	1.6223e-26	135.86	0	0	0	0	1	K	LPEMLK(1)MFEDR	LPEMLK(135.86)MFEDR	6	2	-0.053322	By MS/MS		10170000	10170000	0	45.958	0	10170000	13	11	131	131	78	116	1142	1267	1142	1267	CF_AI-OGA	22090	1142	1267	CF_AI-OGA	22090	1142	1267	CF_AI-OGA	22090
689	0.999867	38.7507	6.5966e-05	72.547	66.766	72.547	0.999867	38.7507	6.5966e-05	72.547	0	0	0	0	1	K	MDNK(1)TWAK	MDNK(38.75)TWAK(-38.75)	4	2	-0.46303	By MS/MS		10249000	10249000	0	12.853	NaN	10249000	14	11	689	689	84	127	1308	1457	1308	1457	CF_AI-OGA	14203	1308	1457	CF_AI-OGA	14203	1308	1457	CF_AI-OGA	14203
693	1	46.4258	0.00196539	46.426	45.221	46.426	1	46.4258	0.00196539	46.426	0	0	0	0	1	K	TWAK(1)SGR	TWAK(46.43)SGR	4	2	-0.15272	By MS/MS		9299100	9299100	0	11.662	NaN	9299100	15	11	693	693	84;124	127;184	1734	1939;1940	1734	1939	CF_AI-OGA	12662	1734	1939	CF_AI-OGA	12662	1734	1939	CF_AI-OGA	12662
191	0.933832	11.4962	2.74879e-06	61.641	61.641	61.641	0.933832	11.4962	2.74879e-06	61.641	0	0	0	0	1	K	RIEAIPQIDK(0.934)YLK(0.066)	RIEAIPQIDK(11.5)YLK(-11.5)	10	3	0.64131	By MS/MS		3291000	3291000	0	10.26	NaN	3291000	16	11	191	191	100	157	1601	1798	1601	1798	CF_AI-OGA	18201	1601	1798	CF_AI-OGA	18201	1601	1798	CF_AI-OGA	18201
507	1	81.865	1.69394e-08	81.865	81.865	81.865	1	81.865	1.69394e-08	81.865	0	0	0	0	1	K	SAAK(1)HAQVLNR	SAAK(81.87)HAQVLNR	4	3	0.57902	By MS/MS		14269000	14269000	0	4.4121	NaN	14269000	17	11	507	507	101;106	158;164	1602	1799	1602	1799	CF_AI-OGA	9191	1602	1799	CF_AI-OGA	9191	1602	1799	CF_AI-OGA	9191
503	0.989738	19.8428	3.51632e-08	64.65	62.037	64.65	0.989738	19.8428	3.51632e-08	64.65	0	0	0	0	1	K	SFAIYWDNIQDK(0.99)SAAK(0.01)	SFAIYWDNIQDK(19.84)SAAK(-19.84)	12	3	0.53494	By MS/MS		1029400	1029400	0	0.31831	NaN	1029400	18	11	503	503	106	164	1657	1870	1657	1870	CF_AI-OGA	21239	1657	1870	CF_AI-OGA	21239	1657	1870	CF_AI-OGA	21239
Ratio mod/base >10	Ratio mod/base >40	Delta score > 40
419	131	11
131		40
689		45
693		87
191		113
		131
		419
		507
		693
		705
		521
